# Supplementary material for: Do Not Stop: The Importance of Seamless Monitoring and Enforcement in an Indonesian Marine Protected Area
Source: Hindawi journal article supplement (doi:10.1155/2011/501465), 2011-01-01
Supplement: f1 [file 501465.f1.docx]

SUPPLEMENTARY MATERIALS

Supplementary Materials 1. The numbers of fish during peak aggregation months for *Plectropomus areolatus* at two spawning aggregation sites in Komodo National Park, Indonesia. The peak aggregation month (where ≥20 fish were recorded) in each year and at each site is underlined. ‘-‘: no data collected.

| Sites | 1998 | 1999 | 2000 | 2001 | 2002 | 2005 | 2006 | 2007 | 2008 |
| --- | --- | --- | --- | --- | --- | --- | --- | --- | --- |
| Site 7 |  |  |  |  |  |  |  |  |  |
| Sep | 8 | 11 | 12 | 22 | 19 | 21 | 1 | 20 | 0 |
| Oct | 25 | 20 | 24 | 32 | 20 | 8 | 1 | 7 | 4 |
| Nov | 11 | 4 | 16 | 31 | 18 | 0 | 1 | 4 | 4 |
| Dec | 11 | 6 | 11 | 23 | 23 | 6 | 0 | - | 0 |
| Site 8 |  |  |  |  |  |  |  |  |  |
| Sep | 18 | 50 | 20 | 47 | 62 | 12 | 5 | 2 | 0 |
| Oct | 46 | 72 | 41 | 92 | 48 | 10 | 2 | 2 | 0 |
| Nov | 58 | 49 | 61 | 62 | 40 | 5 | 3 | 0 | 2 |
| Dec | 43 | 26 | 64 | 64 | 22 | 8 | 1 | - | 0 |

Supplementary Materials 2. The numbers of fish during peak spawning months for *Epinephelus fuscoguttatus* at Site 7 in Komodo National Park. The peak aggregation month in each year is underlined. ‘-’: no data collected.

| Month | 1998 | 1999 | 2000 | 2001 | 2002 | 2005 | 2006 | 2007 | 2008 |
| --- | --- | --- | --- | --- | --- | --- | --- | --- | --- |
| Sep | 25 | 45 | 8 | 42 | 11 | 45 | 46 | 57 | 46 |
| Oct | 59 | 49 | 51 | 17 | 30 | 7 | 68 | 60 | 88 |
| Nov | 52 | 9 | 41 | 35 | 24 | 34 | 26 | 26 | 77 |
| Dec | 86 | 31 | 44 | 24 | 20 | 41 | 31 | - | 9 |
| Jan | 55 | 28 | 15 | 16 | 15 | 0 | 9 | 10 | - |
| Feb | 43 | 12 | 1 | 3 | 5 | 0 | 0 | 2 | - |
| Mar | 6 | 2 | 2 | 2 | 3 | 2 | 4 | ? | - |

Supplementary Materials 3. Length frequency distributions (total length, cm) of *Plectropomus areolatus* recorded at two spawning aggregation sites in Komodo National Park. Black and grey bars represent fish recorded during full moon and new moon periods, respectively. n = number of fish measured.

Supplementary Material 4. Length frequency distributions (total length, cm) of *Epinephelus fuscoguttatus* recorded at two spawning aggregation sites in Komodo National Park. Black and grey bars represent fish recorded during full moon and new moon periods, respectively. n = number of fish measured.
